# Supplementary material for: Stimulation of the Defense Mechanisms of Potatoes to a Late Blight Causative Agent When Treated with Bacillus subtilis Bacteria and Chitosan Composites with Hydroxycinnamic Acids
Source: MDPI journal article supplement (doi:10.3390/microorganisms11081993), 2023-08-02
Supplement: s1 [file s1]

Table S1

The experimental groups, demonstrating significant differences by the Duncan's test.

| Parameter                     | Experimental group 1               | Experimental group 2               | p-value |
|-------------------------------|------------------------------------|------------------------------------|---------|
| Symptoms                      | Water + ChFA                       | 26D                                | 0,01    |
| Symptoms                      | Water + ChFA                       | 26D + ChFA                         | 0,02    |
| Symptoms                      | 26D + ChFA                         | 11VM                               | 0,03    |
| Symptoms                      | 26D + ChFA                         | 11VM + ChCA                        | 0,04    |
| H <sub>2</sub> O <sub>2</sub> | Water + ChCA                       | Water + ChFA                       | 0,01    |
| H <sub>2</sub> O <sub>2</sub> | Water + ChCA                       | 26D + ChCA                         | 0,001   |
| H <sub>2</sub> O <sub>2</sub> | Water + ChCA                       | 26D + ChFA                         | 0,001   |
| H <sub>2</sub> O <sub>2</sub> | Water + ChCA                       | 11VM                               | 0,001   |
| H <sub>2</sub> O <sub>2</sub> | Water + ChCA                       | 11VM + ChFA                        | 0,001   |
| H <sub>2</sub> O <sub>2</sub> | 26D                                | 26D + ChFA                         | 0,001   |
| H <sub>2</sub> O <sub>2</sub> | 26D                                | 11VM + ChFA                        | 0,001   |
| H <sub>2</sub> O <sub>2</sub> | 11VM + ChCA                        | 11VM + ChFA                        | 0,001   |
| H <sub>2</sub> O <sub>2</sub> | 26D + <i>P. infestans</i>          | 11VM + ChCA + <i>P. infestans</i>  | 0,02    |
| H <sub>2</sub> O <sub>2</sub> | 26D + ChFA + <i>P. infestans</i>   | 11VM + ChCA + <i>P. infestans</i>  | 0,03    |
| Proline                       | 26D + ChCA + <i>P. infestans</i>   | 26D + ChFA + <i>P. infestans</i>   | 0,01    |
| Proline                       | 26D + ChFA + <i>P. infestans</i>   | 11VM + ChCA + <i>P. infestans</i>  | 0,03    |
| Peroxidase                    | 11VM + ChCA                        | 11VM + ChFA                        | 0,04    |
| Catalase                      | Water + ChFA                       | 11VM                               | 0,01    |
| Catalase                      | 26D                                | 11VM                               | 0,01    |
| Catalase                      | Water + <i>P. infestans</i>        | Water + ChCA + <i>P. infestans</i> | 0,01    |
| Catalase                      | Water + <i>P. infestans</i>        | 26D + ChCA + <i>P. infestans</i>   | 0,001   |
| Catalase                      | Water + <i>P. infestans</i>        | 11VM + ChCA + <i>P. infestans</i>  | 0,01    |
| Catalase                      | 26D + <i>P. infestans</i>          | 26D + ChCA + <i>P. infestans</i>   | 0,01    |
| Catalase                      | 26D + ChFA + <i>P. infestans</i>   | 26D + ChCA + <i>P. infestans</i>   | 0,02    |
| Catalase                      | Water + ChCA + <i>P. infestans</i> | 11VM + ChFA + <i>P. infestans</i>  | 0,01    |
| Catalase                      | 26D + ChCA + <i>P. infestans</i>   | 11VM + ChFA + <i>P. infestans</i>  | 0,01    |
| Catalase                      | 11VM + ChCA + <i>P. infestans</i>  | 11VM + ChFA + <i>P. infestans</i>  | 0,01    |
